# Supplementary material for: Shading-Dependent Greening Process of the Leaves in the Light-Sensitive Albino Tea Plant ‘Huangjinya’: Possible Involvement of the Light-Harvesting Complex II Subunit of Photosystem II in the Phenotypic Characteristic
Source: MDPI journal article supplement (doi:10.3390/ijms241210314), 2023-06-18
Supplement: s1 [file s1]

## Supplementary files

**Table S1.** Light intensity on the plucking table of tea bush under natural light condition and after shading treatment ( $\mu\text{mol photons m}^{-2} \text{ s}^{-1}$ )

| Time                    | Natural light | Shading treatment | Light transmittance (%) |
|-------------------------|---------------|-------------------|-------------------------|
| 14:00, 21 <sup>th</sup> | 1528.50±28.56 | 160.00±10.13      | 10.46±0.53              |
| 14:00, 24 <sup>th</sup> | 1603.17±34.44 | 161.67±15.73      | 10.08±0.91              |
| 14:00, 26 <sup>th</sup> | 1589.17±30.16 | 170.50±10.69      | 10.74±0.78              |
| 14:00, 27 <sup>th</sup> | 1533.50±66.35 | 173.67±9.55       | 11.35±0.78              |
| Average                 | 1563.58±54.02 | 166.46±13.12      | 10.66±0.89              |

**Table S2.** Sequences of primer pair for quantitative real-time PCR

| Gene ID      | Gene name      | Primer sequence (5'-3')                               |
|--------------|----------------|-------------------------------------------------------|
| LOC114296039 | <i>β-actin</i> | F: cttcctcatgctatcctccgtctt; R: atttcccgttcagcagtggtg |
| LOC14412515  | <i>PsbA</i>    | F: tcggcttttaagtgcggcta; R: tccccttcaggatcagtcgt      |
| LOC114319249 | <i>PsbB</i>    | F: cagctgcccggagtcattt; R: tacgaatctcctcagcacgc       |
| CSS0037852   | <i>PsbC</i>    | F: acctgcgtgcctatgacttc; R: cgccatccaagcacgaatac      |
| CSS0011377   | <i>PsbD</i>    | F: tggtccaactgggtttgt; R: cgatgacaaacggaagtgcg        |
| CSS0013089   | <i>Lhcb1.1</i> | F: cgttggcagaggaaggatca; R: cgaacttgacaccattgcgg      |
| CSS0039893   | <i>Lhcb1.2</i> | F: Gaaccgtgagcttgaggtga; R: gctccagccttgaaccagat      |
| CSS0010537   | <i>Lhcb1.3</i> | F: taggagaggtgacagaccg; R: ccaggttctccaatggtccc       |
| CSS0017867   | <i>Lhcb2.1</i> | F: tgtaagttcggtaggcag; R: attgccagccgtccattctt        |
| CSS0046252   | <i>Lhcb2.2</i> | F: tccaaacctgatccatgcc; R: ggctggacgaagaatccaa        |
| CSS0015941   | <i>Lhcb3.1</i> | F: gccagtatggtcaaagccg; R: ggcatcggcaagaccaat         |
| CSS0049576   | <i>Lhcb3.2</i> | F: ccctggtgactatggtggg; R: ttgagctcctgcctgaacc        |
| CSS0043476   | <i>Lhcb4</i>   | F: catgttggtacgcttggtg; R: tccgggtacaacctctct         |
| LOC114267048 | <i>Lhcb5</i>   | F: aggcggtccatttgatccat; R: gcaagcacagtgaagcaagt      |
| CSS0010636   | <i>Lhcb6</i>   | F: agtcgcagtctgttgagtgg; R: gtctccctgtccagcctc        |
| CSS0010117   | <i>GUN1</i>    | F: gcatttcggccgcaaaa; R: atcgccgcaactgtatcg           |
| CSS0018354   | <i>PTM</i>     | F: gcagaaaacgtgctcggc; R: tcccacctccacaaa             |
| CSS0005165   | <i>ABI4</i>    | F: gtaaacgggtcgggtcc; R: ttccgcccgctctctt             |
| CSS0018705   | <i>Hsp90</i>   | F: ccgtcttgctgacacccc; R: gagcacctcttgctcg            |
| CSS0027798   | <i>ALB3</i>    | F: ccactggcagggtgtctg; R: agttggaccagcgaggga          |
| LOC114264785 | <i>cpSRP43</i> | F: ggacggtgcagataacgagt; R: actccgccacagcatattcc      |
| CSS0014332   | <i>cpSRP54</i> | F: aggcagtttgcgggactc; R: tgttgccatgtccgtga           |
| CSS0006849   | <i>cpFtsY</i>  | F: cggtcacgacgagctcc; R: cccgcaagctctccaaa            |
| LOC114318181 | <i>HY5</i>     | F: ggagagtgccggagatcg; R: gaagatgcctggaccggg          |

**Table S3.** RNA sequencing data obtained from the leaves of ‘Huangjinya’ during short-term shading

| Name     | Sequence number | Bases number | Q30 (bp)   | N (%)    | Q20 (%) | Q30 (%) |
|----------|-----------------|--------------|------------|----------|---------|---------|
| HJY_0_1  | 42848806        | 6470169706   | 6086036368 | 0.001487 | 98      | 94.06   |
| HJY_0_2  | 43727392        | 6602836192   | 6194160247 | 0.001479 | 97.92   | 93.81   |
| HJY_0_3  | 45239370        | 6831144870   | 6423442764 | 0.001496 | 97.99   | 94.03   |
| HJY_12_1 | 44950060        | 6787459060   | 6322060291 | 0.004169 | 97.56   | 93.14   |
| HJY_12_2 | 42984276        | 6490625676   | 6048780489 | 0.004229 | 97.59   | 93.19   |
| HJY_12_3 | 42842392        | 6469201192   | 6026793781 | 0.004200 | 97.56   | 93.16   |
| HJY_24_1 | 47643042        | 7194099342   | 6703416910 | 0.004148 | 97.58   | 93.17   |
| HJY_24_2 | 46256212        | 6984688012   | 6517304274 | 0.004149 | 97.63   | 93.3    |
| HJY_24_3 | 42428030        | 6406632530   | 6009931474 | 0.004180 | 97.83   | 93.8    |
| HJY_72_1 | 42664456        | 6442332856   | 6010849398 | 0.004126 | 97.63   | 93.3    |
| HJY_72_2 | 44388036        | 6702593436   | 6233114606 | 0.004141 | 97.48   | 92.99   |
| HJY_72_3 | 40957402        | 6184567702   | 5768319962 | 0.004131 | 97.62   | 93.26   |

Note: HJY\_0\_1, HJY\_0\_2 and HJY\_0\_3 indicated the three biological repeats in the leaves of ‘Huangjinya’ grown under natural light condition; HJY\_12\_x, HJY\_24\_x and HJY\_72\_x indicated the three biological repeats in the leaves of ‘Huangjinya’ shaded for 12h, 24h and 72h, respectively. Q30 (bp) referred the total number of bases with base recognition accuracy above 99.9 %; N (%) referred the percentage of fuzzy bases; Q20(%) referred the percentage of bases with base recognition accuracy above 99%; Q30(%) referred the percentage of bases with base recognition accuracy above 99.9%.

**Table S4.** Regional distribution of the clean reads mapping to the reference genome

| Sample   | Clean Reads | Map Events | Mapped<br>to Gene    | Mapped<br>to InterGene | Mapped<br>to Exon    |
|----------|-------------|------------|----------------------|------------------------|----------------------|
| HJY_0_1  | 40069978    | 30039334   | 25871564<br>(86.13%) | 4167770<br>(13.87%)    | 24267301<br>(93.80%) |
| HJY_0_2  | 40939506    | 30520393   | 26361073<br>(86.37%) | 4159320<br>(13.63%)    | 24762253<br>(93.93%) |
| HJY_0_3  | 42176878    | 31482644   | 26650332<br>(84.65%) | 4832312<br>(15.35%)    | 24746138<br>(92.85%) |
| HJY_12_1 | 42118360    | 30936884   | 27131650<br>(87.70%) | 3805234<br>(12.30%)    | 25698416<br>(94.72%) |
| HJY_12_2 | 40241200    | 29474987   | 25776455<br>(87.45%) | 3698532<br>(12.55%)    | 24336254<br>(94.41%) |
| HJY_12_3 | 40129790    | 29444634   | 25651533<br>(87.12%) | 3793101<br>(12.88%)    | 24172687<br>(94.23%) |
| HJY_24_1 | 44649514    | 32809511   | 28589454<br>(87.14%) | 4220057<br>(12.86%)    | 26532782<br>(92.81%) |
| HJY_24_2 | 43373118    | 31930811   | 28010483<br>(87.72%) | 3920328<br>(12.28%)    | 26180374<br>(93.47%) |
| HJY_24_3 | 39738814    | 29235707   | 25496246<br>(87.21%) | 3739461<br>(12.79%)    | 23633836<br>(92.70%) |
| HJY_72_1 | 40008700    | 29409274   | 25801309<br>(87.73%) | 3607965<br>(12.27%)    | 24174171<br>(93.69%) |
| HJY_72_2 | 41611276    | 30462189   | 26449730<br>(86.83%) | 4012459<br>(13.17%)    | 24436414<br>(92.39%) |
| HJY_72_3 | 38298892    | 28099628   | 24600537<br>(87.55%) | 3499091<br>(12.45%)    | 23029986<br>(93.62%) |

Note: HJY\_0\_1, HJY\_0\_2 and HJY\_0\_3 indicated the three biological repeats in the leaves of ‘Huangjinya’ grown under natural light condition; HJY\_12\_x, HJY\_24\_x and HJY\_72\_x indicated the three biological repeats in the leaves of ‘Huangjinya’ shaded for 12h, 24h and 72h, respectively.

**Table S5.** Key differentially expressed genes involved in pathways of chlorophyll synthesis and degradation, LHCII subunit translocation and degradation as well as plastid retrograde signaling screened out from transcriptome analysis.

| Gene ID                   | HJY0   | HJY12  | HJY24  | HJY72  | Function                             |
|---------------------------|--------|--------|--------|--------|--------------------------------------|
| GSAAT-CSS0005977          | 34.34  | 60.43  | 48.22  | 55.00  | Chlorophyll synthesis                |
| GluTR-CSS0041947          | 26.34  | 114.31 | 121.61 | 180.27 | Chlorophyll synthesis                |
| CPO-CSS0003887            | 58.86  | 96.56  | 67.42  | 70.14  | Chlorophyll synthesis                |
| UROS-CSS0036187           | 25.00  | 52.45  | 50.15  | 48.71  | Chlorophyll synthesis                |
| UROD-CSS0044621           | 95.41  | 156.89 | 132.40 | 130.03 | Chlorophyll synthesis                |
| CHLM-CSS0004907           | 76.26  | 165.32 | 104.82 | 87.90  | Chlorophyll synthesis                |
| PPOX-CSS0007697           | 23.56  | 47.11  | 41.17  | 46.31  | Chlorophyll synthesis                |
| POR-CSS0033593            | 23.01  | 393.82 | 359.43 | 440.45 | Chlorophyll synthesis                |
| CHL27-CSS0045826          | 18.81  | 48.24  | 52.12  | 79.76  | Chlorophyll synthesis                |
| CBR-CSS0001462            | 26.29  | 67.08  | 69.66  | 80.66  | Chlorophyll synthesis                |
| FC-CSS0012423             | 73.77  | 38.47  | 38.25  | 40.94  | Chlorophyll synthesis                |
| HY1-CSS0000206            | 20.75  | 9.75   | 10.20  | 9.12   | Chlorophyll synthesis                |
| PAO-CSS0024763            | 23.80  | 14.06  | 15.77  | 13.77  | Chlorophyll breakdown                |
| RCCR-CSS0031276           | 81.52  | 31.50  | 23.32  | 27.88  | Chlorophyll breakdown                |
| PSBP1-CSS0016981          | 54.37  | 546.16 | 523.31 | 610.03 | LHCB translocation                   |
| GLK1-CSS0001889           | 6.19   | 3.33   | 1.94   | 5.92   | LHCB translocation                   |
| TIC55-CSS0018677          | 4.01   | 1.84   | 1.48   | 1.17   | LHCB translocation                   |
| TOC64-CSS0011043          | 6.97   | 1.03   | 1.90   | 2.52   | LHCB translocation                   |
| TOC75-CSS0026296          | 76.95  | 38.89  | 31.83  | 34.29  | LHCB translocation                   |
| TOC 159-CSS0025255        | 144.98 | 79.42  | 56.74  | 61.25  | LHCB translocation                   |
| Hsp70-CSS0018653          | 506.08 | 17.30  | 32.17  | 46.15  | LHCB translocation                   |
| Hsp90-CSS0018705          | 555.96 | 206.81 | 180.78 | 216.40 | LHCB translocation                   |
| cpn60-CSS0018215          | 0.90   | 6.29   | 3.48   | 3.42   | LHCB translocation                   |
| cpn60-CSS0029920          | 1.24   | 6.36   | 6.07   | 10.59  | LHCB translocation                   |
| 14-3-3 protein-CSS0027025 | 38.50  | 207.98 | 251.18 | 183.51 | LHCB translocation                   |
| cpSRP54-CSS0014332        | 120.70 | 85.17  | 59.48  | 64.81  | LHCB translocation                   |
| cpSRP54-CSS0046572        | 6.58   | 5.26   | 8.69   | 6.99   | LHCB translocation                   |
| cpFtsY-CSS0006849         | 61.31  | 36.42  | 29.00  | 32.23  | LHCB translocation                   |
| LTD-CSS0021065            | 133.84 | 137.46 | 101.23 | 110.64 | LHCB translocation                   |
| ALB4-CSS0027798           | 129.62 | 63.00  | 52.01  | 50.48  | LHCB translocation                   |
| Atg8-CSS0028099           | 13.56  | 35.42  | 34.23  | 26.77  | LHCB degradation                     |
| Atg18-CSS0041332          | 2.50   | 10.50  | 8.84   | 9.60   | LHCB degradation                     |
| Clp-CSS0009500            | 0.50   | 0.81   | 0.71   | 0.86   | LHCB degradation                     |
| ClpPR4-CSS0029485         | 22.23  | 46.86  | 44.23  | 38.62  | LHCB degradation                     |
| FtsH6-CSS0025086          | 0.20   | 3.80   | 8.48   | 10.42  | LHCB degradation                     |
| FtsH10-CSS0008560         | 57.95  | 18.39  | 20.18  | 21.22  | LHCB degradation                     |
| FtsH11-CSS0014825         | 2.20   | 2.46   | 1.53   | 1.95   | LHCB degradation                     |
| SAGs-CSS0020038           | 67.89  | 7.37   | 4.91   | 5.24   | LHCB degradation                     |
| GUN1-CSS0010117           | 52.75  | 25.76  | 18.34  | 18.00  | Plastid retrograde signaling pathway |
| GUN1-CSS0036979           | 86.05  | 86.17  | 58.63  | 71.23  | Plastid retrograde signaling pathway |

|                  |        |        |        |        |                                      |
|------------------|--------|--------|--------|--------|--------------------------------------|
| PTM-CSS0018354   | 18.52  | 10.24  | 10.64  | 10.20  | Plastid retrograde signaling pathway |
| ABI4-CSS0018330  | 40.57  | 7.84   | 6.23   | 6.92   | Plastid retrograde signaling pathway |
| ABI4-CSS0005165  | 24.52  | 3.83   | 4.49   | 4.90   | Plastid retrograde signaling pathway |
| EX1-CSS0042248   | 72.73  | 44.17  | 44.23  | 45.80  | Plastid retrograde signaling pathway |
| EX1-CSS0042898   | 322.17 | 204.79 | 182.41 | 172.69 | Plastid retrograde signaling pathway |
| cpAPX-CSS0040488 | 7.04   | 16.18  | 13.44  | 14.02  | Plastid retrograde signaling pathway |
| FC2-CSS0006733   | 6.26   | 11.76  | 9.18   | 9.67   | Plastid retrograde signaling pathway |
| GLK2-CSS0003354  | 0.68   | 1.20   | 3.21   | 2.91   | Plastid retrograde signaling pathway |
| APX-CSS0034174   | 343.43 | 282.84 | 474.45 | 625.90 | Plastid retrograde signaling pathway |

Note: Data in table were the average values of the FPKM obtained from three biological repeats. HJY0 represented the leaves of ‘HJY’ grown under natural light condition, HJY12-72 represented the leaves of ‘HJY’ shaded for 12h, 24h and 72h, respectively.

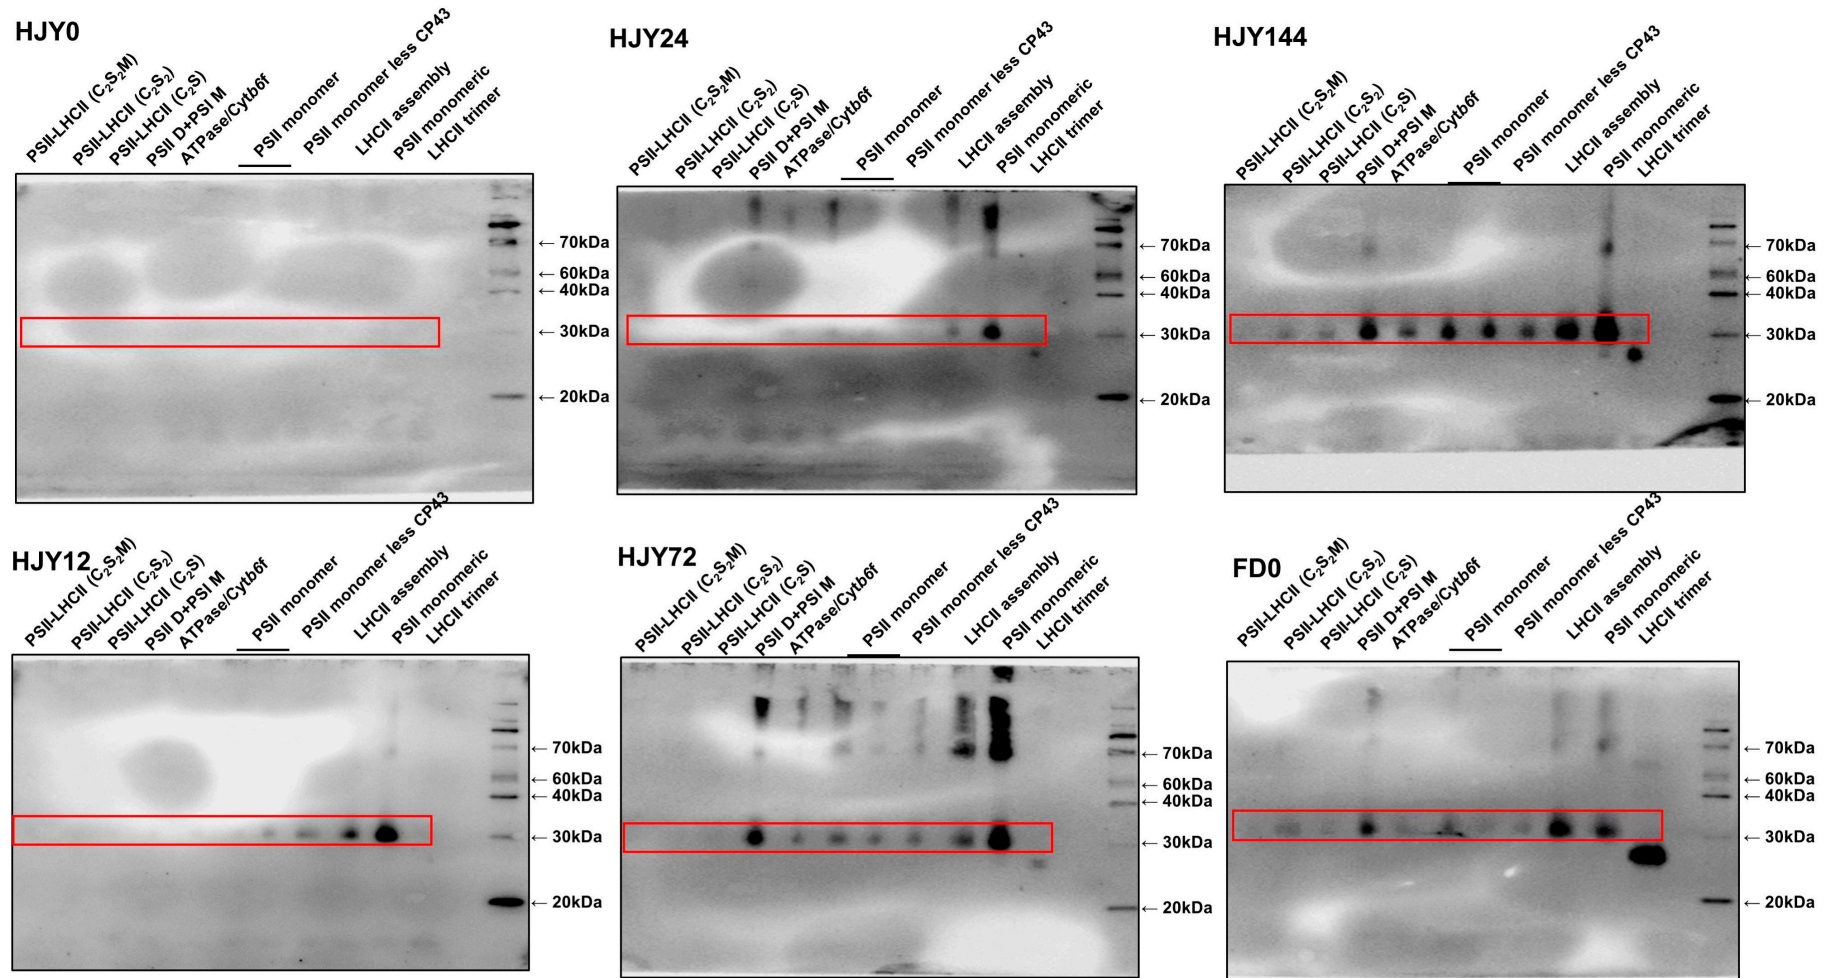

**Figure S1.** Original images for blots of Figure 6. In details, images exhibited D2 signals detected from various pigment-protein complexes in the leaves of ‘HJY’ during shading treatment. HJY0-HJY144 indicated the leaves of ‘HJY’ shaded for 0-144 h. FD0 indicated the leaves of ‘FD’ under natural light condition.

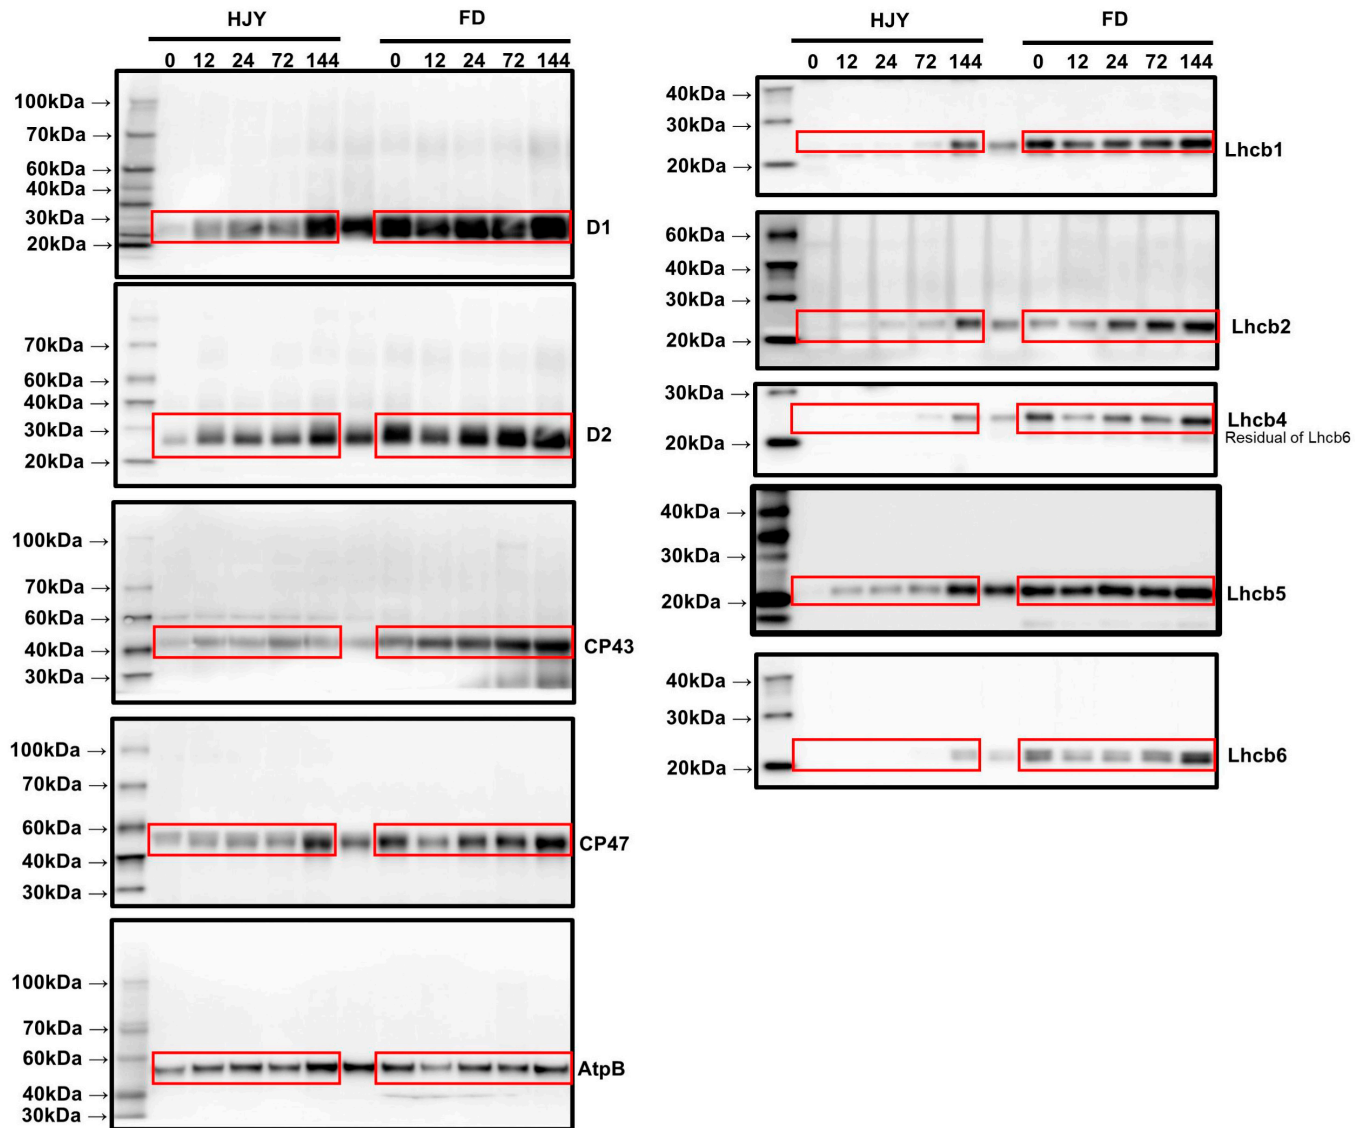

**Figure S2.** Original images for blots of Figure 7A. In details, images exhibited the changes in the PSII core complex and LHCII subunits during short-term shading treatment. HJY0-HJY144 and FD0-FD144 indicated the leaves of 'HJY' and 'FD' shaded for 0-144h.



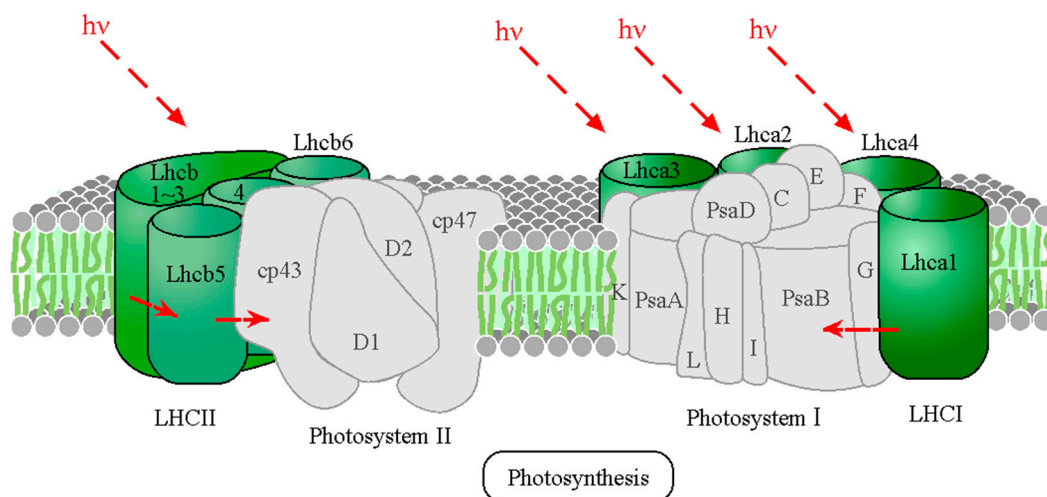

Light-harvesting chlorophyll protein complex (LHC)

|       |       |       |       |       |
|-------|-------|-------|-------|-------|
| Lhca1 | Lhca2 | Lhca3 | Lhca4 | Lhca5 |
|-------|-------|-------|-------|-------|

|       |       |       |       |       |       |       |
|-------|-------|-------|-------|-------|-------|-------|
| Lhcb1 | Lhcb2 | Lhcb3 | Lhcb4 | Lhcb5 | Lhcb6 | Lhcb7 |
|-------|-------|-------|-------|-------|-------|-------|

**Figure S3.** DEGs in photosynthesis-antenna protein pathway (Ko 00196). Red and blue blocks represented up- and down- regulations, respectively; the color intensity indicated the expression change degree of the DEGs. Each gene box was divided into three parts from left to right, representing the differential expression degree of the DEGs in comparison of HJY12 vs HJY0, HJY24 vs HJY0, and HJY72 vs HJY0.
